# Supplementary material
Source: Royal Society of Chemistry journal article supplement (https://www.rsc.org/suppdata/dt/1998/2477/k803793.doc)
Supplement: Supplementary file 1 [file k803793.doc]

SUPPLEMENTARY MATERIAL

**Complex Chemistry of 4-{2,2’:6’,2’’-Terpyrid-4’-yloxy}-2,2,6,6-tetramethyl-1-piperidinoxyl, a Spin-Labelled Terpyridine.**

**Malcolm A. Halcrow*,†,a, Euan K. Brechinb, Eric J.L. McInnesc,**

**Frank E. Mabbsc and John E. Daviesa.**

*aDepartment of Chemistry, University of Cambridge,*

*Lensfield Road, Cambridge CB2 1EW, U.K.*

*bDepartment of Chemistry, The University of Edinburgh,*

*West Mains Road, Edinburgh EH9 3JJ, U.K.*

*cEPSRC CW EPR Service Centre, Department of Chemistry,*

*University of Manchester, Oxford Road,*

*Manchester M13 9PL, U.K.*

†Present address: School of Chemistry, University of Leeds, Leeds LS2 9JT, U.K.

Table C1. Magnetic data for [Mn(L1)2](BF4)2 (**1**).

T (K) **M **MT T (K) **M **MT

1.79 1.272 2.276 25.02 0.208 5.193

2.00 1.213 2.426 30.02 0.174 5.210

2.20 1.180 2.596 35.02 0.149 5.223

2.40 1.134 2.721 40.01 0.131 5.226

2.60 1.101 2.862 45.01 0.116 5.220

2.80 1.072 3.002 50.00 0.104 5.223

3.00 1.049 3.147 59.94 0.0873 5.231

3.50 1.027 3.594 69.90 0.0747 5.219

4.00 1.014 4.057 79.89 0.0654 5.221

4.49 1.022 4.589 90.08 0.0581 5.235

5.00 0.973 4.863 100.10 0.0523 5.231

5.50 0.909 4.998 125.14 0.0417 5.217

6.01 0.832 5.023 150.17 0.0348 5.221

7.00 0.725 5.076 175.20 0.0298 5.229

8.01 0.636 5.093 200.22 0.0261 5.231

9.01 0.567 5.105 225.21 0.0232 5.233

10.01 0.510 5.109 250.21 0.0209 5.237

12.00 0.428 5.131 275.20 0.0191 5.244

14.00 0.367 5.145 300.18 0.0175 5.261

16.01 0.322 5.158 325.14 0.0162 5.266

18.01 0.287 5.169 340.14 0.0155 5.266

20.01 0.258 5.172

Field strength: 1000 G

Diamagnetic correction from Pascal’s constants: –568.30x10–6 emu.mol–1

Derivation of Van Vleck equation describing intermolecular superexchange in **1**.

**H** = –2*J*(*S*1.*S*2 + *S*1.*S*3) –2*J’*(*S*2.*S*3)

Let *S*A = *S*2 + *S*3

*S*A2 = *S*22 + *S*32 + 2*S*2.*S*3

Let *S*T = *S*1 + *S*A

*S*T2 = *S*12 + *S*A2 + 2*S*1.*S*A

= *S*12 + *S*22 + *S*32 + 2*S*1.*S*2 + 2*S*1.*S*3 + 2*S*2.*S*3

**H** = –2*J*(*S*T2 – *S*A2 – *S*12) –2*J’*(*S*A2 – *S*22 – *S*32)

E(*S*A, *S*T) = –*J*[*S*T(*S*T + 1) – *S*A(*S*A + 1) – *S*1(*S*1 + 1)]

–*J’*[*S*A(*S*A + 1) – *S*2(*S*2 + 1) – *S*3(*S*3 + 1)]

Van Vleck equation:

Calculate relative energies, pre-exponential terms and *g*-values for all E(*S*A, *S*T) states:

*S*1 = 5/2, *S*2 = *S*3 = 1/2

*S*A = 0, 1and *S*T = *S*A + *S*1...*S*A – *S*1

*S*A *S*T E *S*T(*S*T + 1)(2*S*T + 1) 2*S*T + 1 *c ca cb*

0 5/2 –35/4*J* 52.5 6 –1 0 1

1 3/2 –7/4*J –*2*J’* 15 4 –9/5 –2/5 7/5

1 5/2 –27/4*J –*2*J’* 52.5 6 –27/35 4/35 31/35

1 7/2 –55/4*J –*2*J’* 126 8 –3/7 2/7 5/7

Substitute these values into the Van Vleck equation.

Check: set *J* = *J’* = 0

Compare with the Curie law for 1 *S* = 5/2 and 2 *S* = 1/2 non-interacting spins:

Table C2. Magnetic data for [Cu(L1)2](BF4)2 (**4**).

T (K) **M **MT T (K) **M **MT

1.79 0.521 0.932 25.01 0.0448 1.121

2.00 0.478 0.956 30.03 0.0374 1.124

2.20 0.443 0.975 35.02 0.0322 1.127

2.40 0.412 0.988 40.01 0.0283 1.131

2.60 0.385 1.001 45.01 0.0251 1.131

2.80 0.361 1.010 50.00 0.0226 1.132

3.00 0.340 1.019 59.95 0.0189 1.135

3.50 0.297 1.040 69.90 0.0163 1.138

4.00 0.262 1.050 79.84 0.0143 1.140

4.49 0.236 1.061 90.08 0.0127 1.147

5.00 0.214 1.071 100.11 0.0115 1.150

5.50 0.196 1.077 125.13 0.00922 1.155

5.99 0.180 1.081 150.15 0.00775 1.164

7.00 0.156 1.090 175.18 0.00669 1.172

8.01 0.137 1.095 200.19 0.00589 1.180

9.01 0.122 1.099 225.20 0.00528 1.189

10.01 0.110 1.102 250.19 0.00478 1.196

12.01 0.0922 1.107 275.21 0.00437 1.204

14.01 0.0793 1.111 300.19 0.00402 1.208

16.01 0.0695 1.114 325.20 0.00376 1.222

18.01 0.0620 1.116 340.14 0.00361 1.227

20.01 0.0559 1.118

Field strength: 1000 G

Diamagnetic correction from Pascal’s constants: –568.30x10–6 emu.mol–1

Derivation of Van Vleck equation describing intermolecular superexchange in **4**.

As for **1**:

E(*S*A, *S*T) = –*J*[*S*T(*S*T + 1) – *S*A(*S*A + 1) – *S*1(*S*1 + 1)]

–*J’*[*S*A(*S*A + 1) – *S*2(*S*2 + 1) – *S*3(*S*3 + 1)]

Also, when *S*1 = *S*2 = *S*3 = 1/2, *g* can be written as:

*g*(*S*A, *S*T) = *ca*.*g*{L1} + *cb*.*g*{Cu}

where:

*ca* = (1+*c*)/2

*cb* = (1–*c*)/2

and:

Van Vleck equation:

Calculate relative energies, pre-exponential terms and *g*-values for all E(*S*A, *S*T) states:

*S*1 = *S*2 = *S*3 = 1/2

*S*A = 0, 1and *S*T = *S*A + *S*1...*S*A – *S*1

*S*A *S*T E *S*T(*S*T + 1)(2*S*T + 1) 2*S*T + 1 *c ca cb*

0 1/2 –3/4*J* 3/2 2 –1 0 1

1 1/2 5/4*J* –2*J’* 3/2 2 5/3 4/3 –1/3

1 3/2 ­–7/4*J –*2*J’* 15 4 1/3 2/3 1/3

Substitute these values into the Van Vleck equation.

Check: set *J* = 0

Compare with the Curie law for 3 *S* = 1/2 non-interacting spins:

and:

*g* for the entire spin manifold should be the average value [2*g*{L1} + *g*{Cu}]/3.
